# Supplementary material for: An inter-comparison of tropospheric ozone reanalysis products from CAMS, CAMS-Interim, TCR-1 and TCR-2
Source: Copernicus journal article supplement (doi:10.5194/gmd-2019-297), 2019-11-06
Supplement: Supplementary file 1 [file gmd-2019-297-supplement.pdf]

# **Supplementary material to: An inter-comparison of tropospheric ozone reanalysis products from CAM5, CAM5-Interim, TCR-1 and TCR-2**

5 Vincent Huijnen<sup>1</sup>, Kazuyuki Miyazaki<sup>2</sup>, Johannes Flemming<sup>3</sup>, Antje Inness<sup>3</sup>, Takashi Sekiya<sup>4</sup>, Martin G. Schultz<sup>5</sup>

<sup>1</sup> Royal Netherlands Meteorological Institute, De Bilt, the Netherlands

<sup>2</sup> Jet Propulsion Laboratory, California Institute of Technology, Pasadena, CA 91109, USA

10 <sup>3</sup> ECMWF, Shinfield Park, Reading, RG2 9AX, UK

<sup>4</sup> Research Institute for Global Change (RIGC), Japan Agency for Marine–Earth Science and Technology (JAMSTEC), Yokohama 2360001, Japan

<sup>5</sup> Jülich Supercomputing Centre, Forschungszentrum Jülich, Jülich, Germany

*Correspondence to:* V. Huijnen (Vincent.Huijnen@knmi.nl)

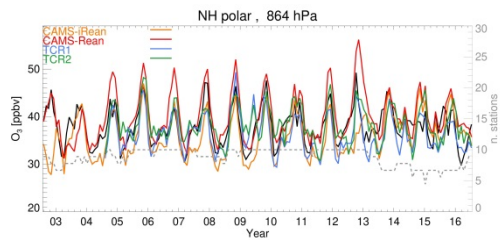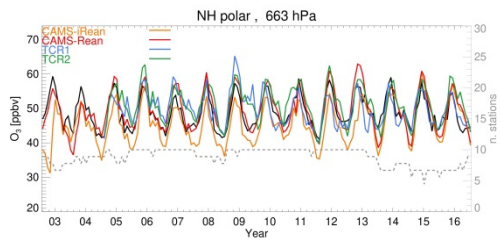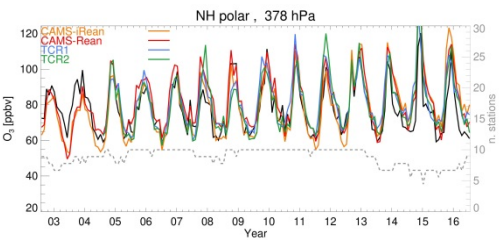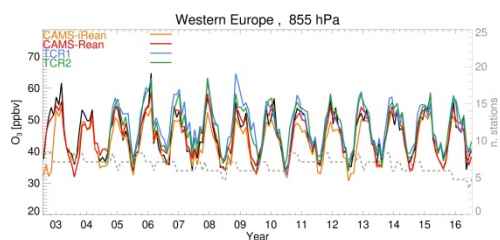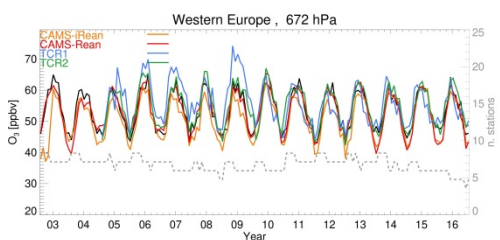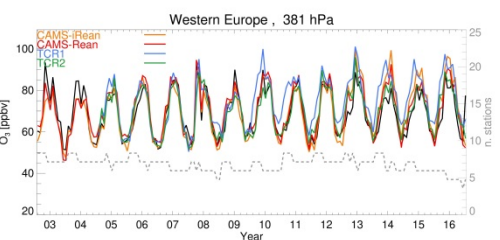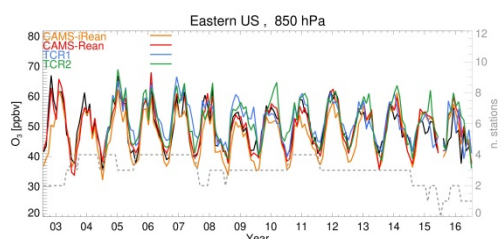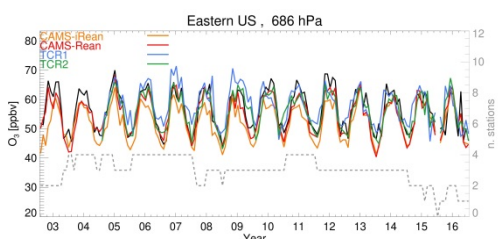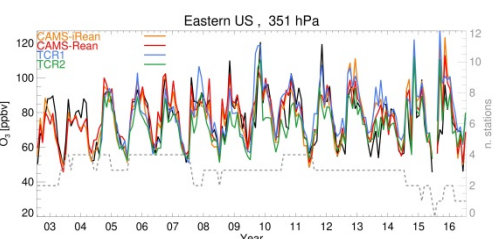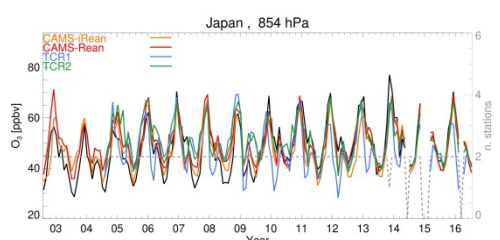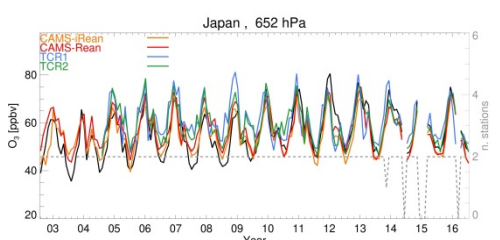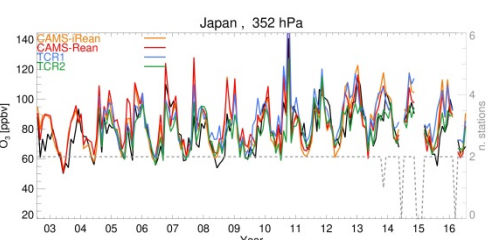

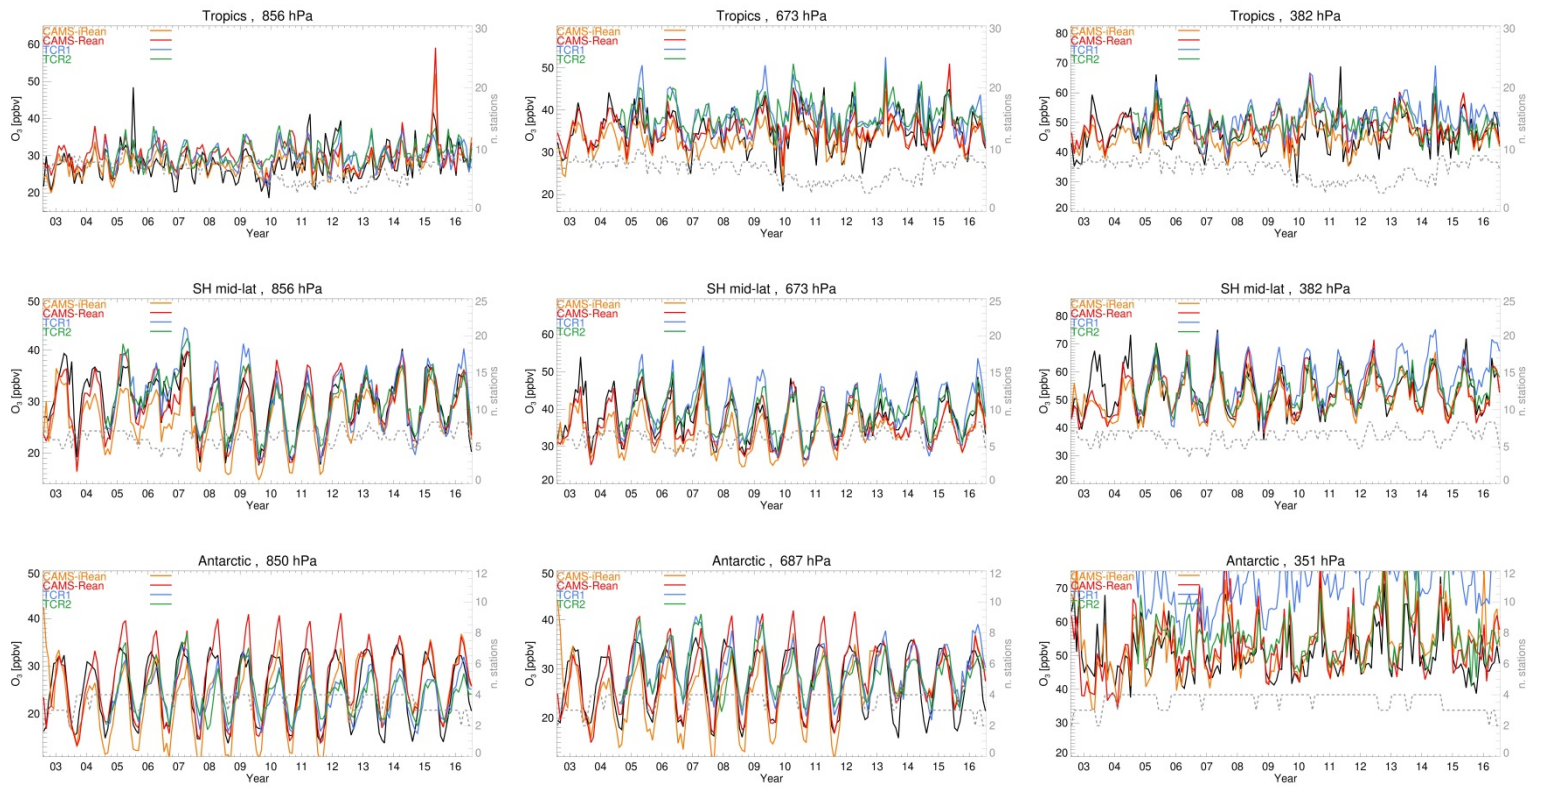

25 **Figure S1. Time series of regionally and monthly aggregated ozone concentrations at different altitudes (850, 650 and 350 hPa), sampled at ozone sonde locations, against ozone sonde observations (black).**

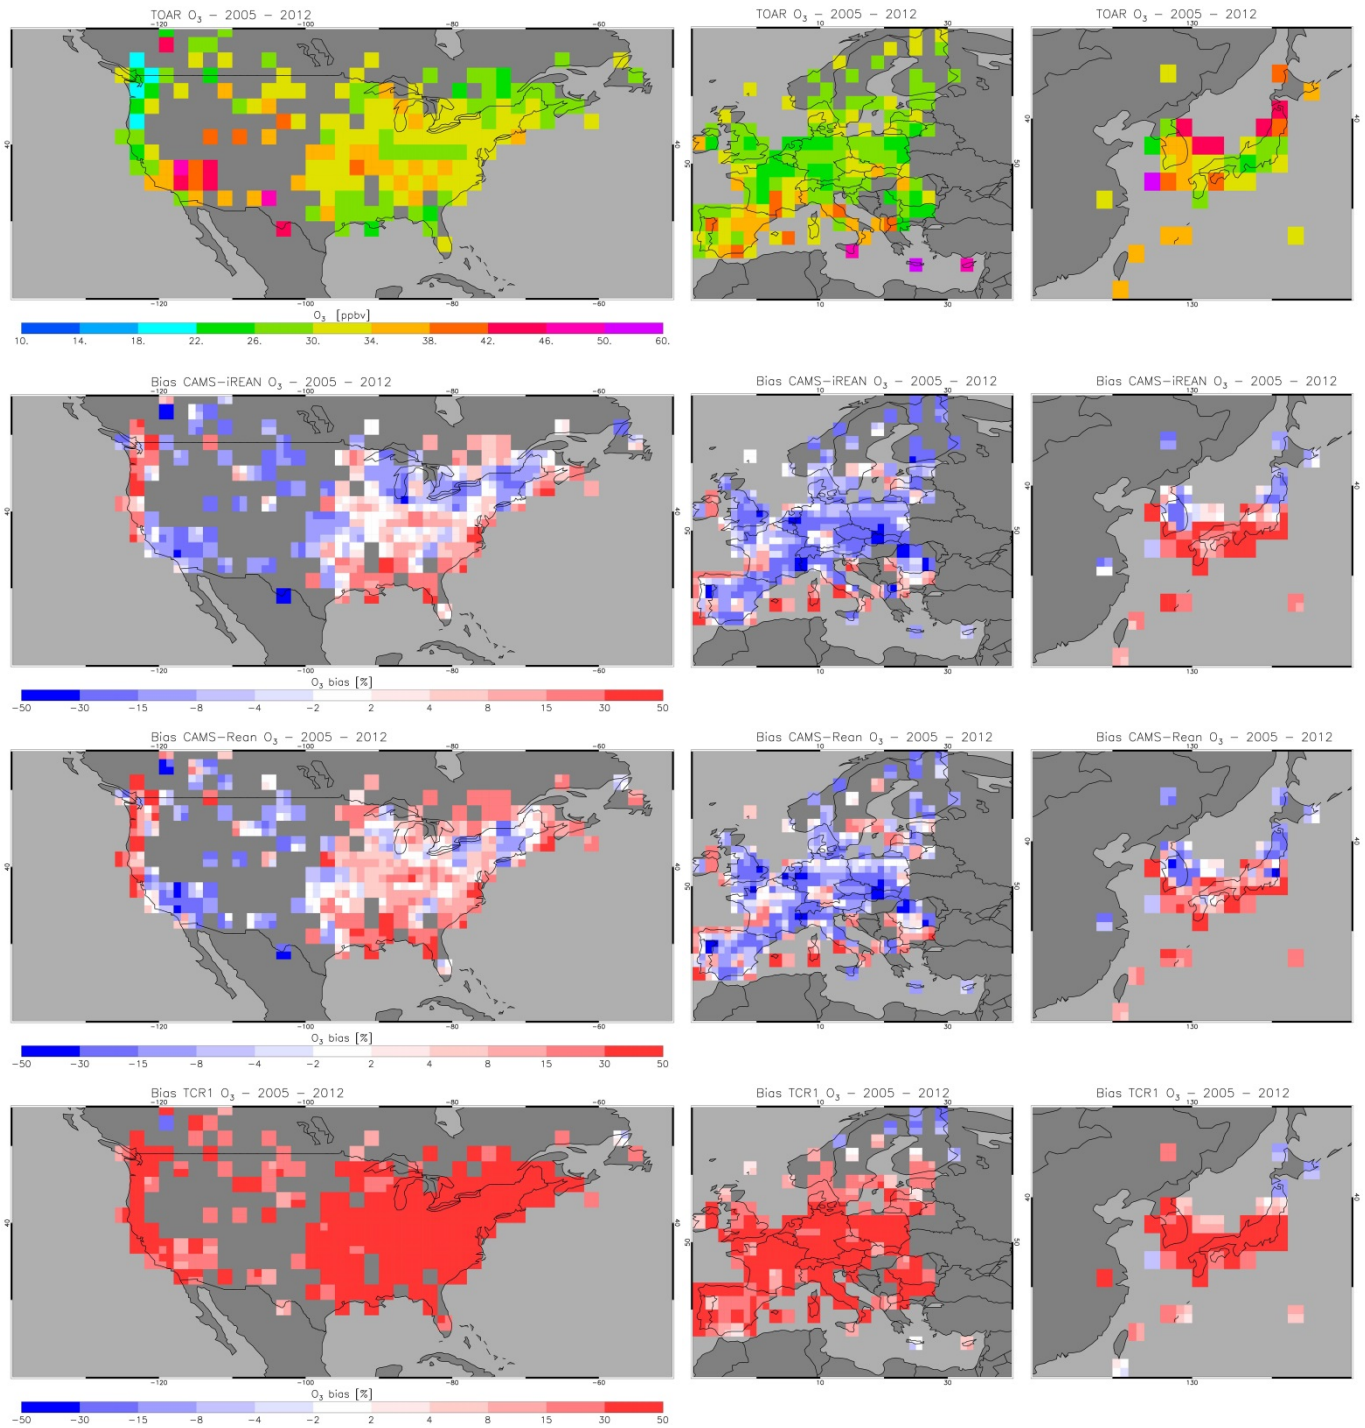

30

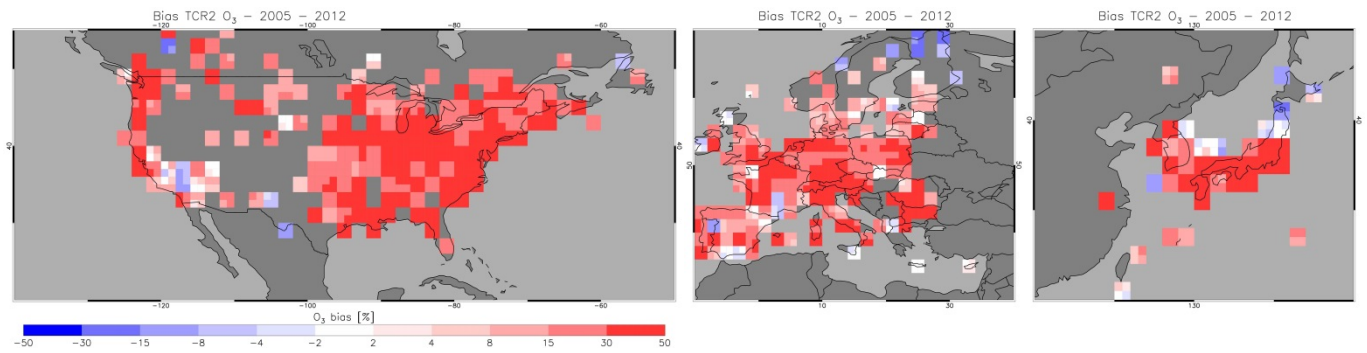

35 **Figure S2:** Multi-annual (2005-2012) mean surface ozone from TOAR for three regions, (top figures), along with corresponding relative mean bias for the reanalyses CAMS-iREAN, CAMS-REAN, TCR1 and TCR2, respectively.

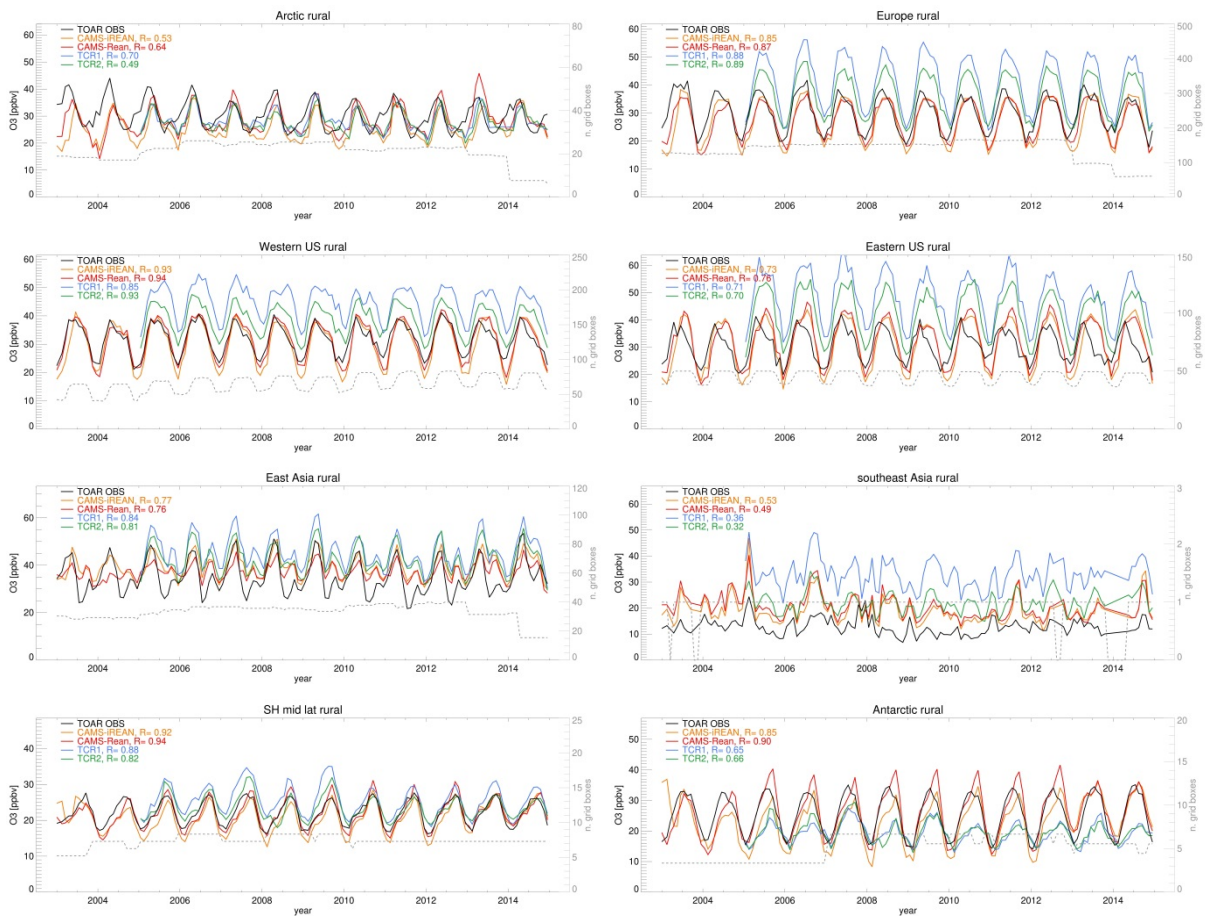

40 **Figure S3:** Time series of regional, monthly mean surface ozone against TOAR observations. The dashed line indicates the number of TOAR  $2^\circ \times 2^\circ$  grid boxes contributing to the statistics (see also right axis). Also the temporal correlation for the 2005-2014 time series is given in the figure legends.

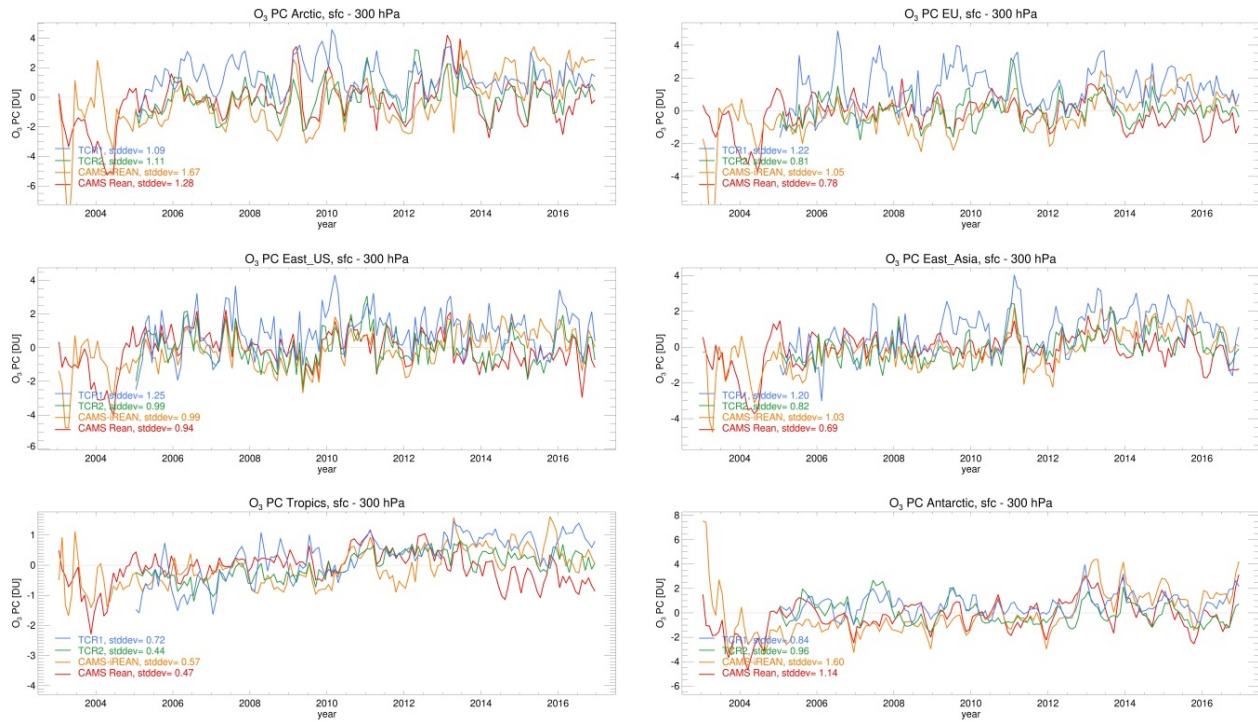

50 **Figure S4: Anomalies in monthly mean  $O_3$  partial columns (surface to 300 hPa) in four reanalyses, averaged for six regions: Arctic (>60°N), Eastern US (90°W – 70°W; 30°N - 43°N), Europe (10°W-30°E; 35°N-60°N), East Asia (108°E-160°E, 20°N-50°N), Tropics (30°S-30°N) and Antarctic (>60°S). Standard deviations for monthly mean anomalies are given, computed for the 2005-2016 time period.**
