# Supplementary material for: An inter-comparison of tropospheric ozone reanalysis products from CAMS, CAMS-Interim, TCR-1 and TCR-2
Source: Copernicus journal article supplement (doi:10.5194/gmd-2019-297), 2019-11-06
Supplement: Supplementary file [file gmd-2019-297-RC3-supplement.pdf]

**Interactive comment on “An inter-comparison of tropospheric ozone reanalysis products from CAMS, CAMS-Interim, TCR-1 and TCR-2” by Vincent Huijnen et al.**

This paper inter-compared tropospheric ozone reanalysis products from CAMS, CAMS-Interim, TCR-1, and TCR-2. This study is of scientific importance and the research is well conducted. The presentation is generally clear with logic flow and convincing discussions. The paper provides an enhanced understanding of issues related to tropospheric ozone reanalysis products. I only have some minor issues for the authors to consider when revising their paper.

Minor issues:

1. In the abstract and conclusions, it is useful to summary where and when the reanalysis products perform strongest and weakest, in term of relative difference with ozonesonde data.
2. Figures and tables need more annotation.  
Fig. 1, What are the boxed areas?  
Table 5-7, the area definitions can be provided in Fig. 1.  
Fig. 4. Relative difference is more meaningful.  
Fig. 11, what is the time zone for this figure? How are the model errors removed?
3. The definition of the tropopause needs some discussion and references.
4. The paper appears lengthy. Please shorten the paper and move less significant contents to Supplements.
